# Supplementary material
Source: Springer Nature journal article supplement (https://www.springermedizin.de/resource/supplementary/12985_2010_1075_MOESM4_ESM.pdf/9609090)

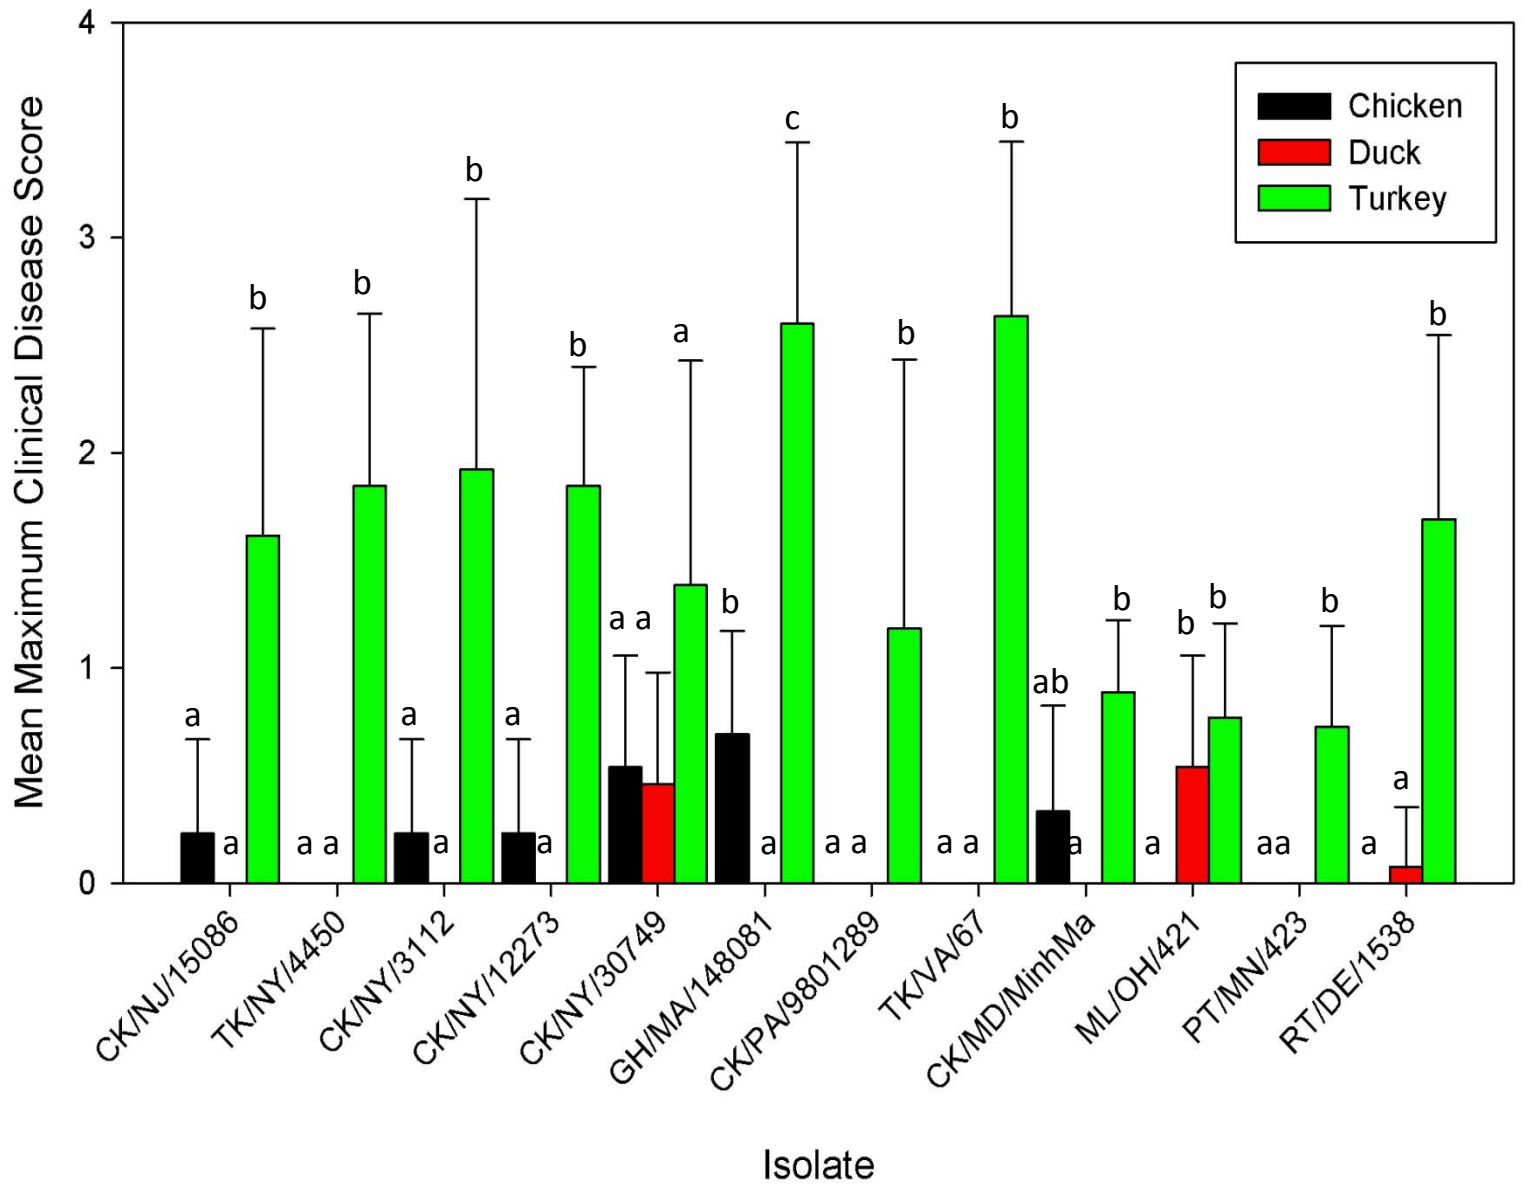

Supplement: MOESM4 [file 9609090]
